# Supplementary material
Source: publisher figshare collection journal article supplement (https://diabetesjournals.figshare.com/articles/dataset/_/16556181)
Supplement: Supplementary file 1 [file 1]

**SUPPLEMENTARY DATA**

**Spatial Regulation of Reactive Oxygen Species via G6PD in Brown Adipocytes Supports Thermogenic Function**

Jee Hyung Sohn, Yul Ji, Chang-Yun Cho, Hahn Nahmgoong, Sangsoo Lim, Yong Geun Jeon, Sang Mun Han, Ji Seul Han, Isaac Park, Hyun-Woo Rhee, Sun Kim and Jae Bum Kim

**Supplementary Figure 1. Bioinformatics analyses of genes enriched in BAT and increased by cold stimulation.** A: Differentially expressed genes identified with  $FC \geq 1.4$  and  $FDR < 0.05$  cut-off. B: Identification of 77 candidate genes which are commonly upregulated upon cold stimulation in BAT using two microarray data set. Candidate genes were screened using FC value and FDR at the thresholds ( $FC \geq 1.4$  and  $FDR < 0.05$ ). C: PPI subnetwork containing genes in the top 5% of the NP score. Red dots and grey dots indicate candidate genes and genes affected by candidate genes, respectively. Node size represents NP score.

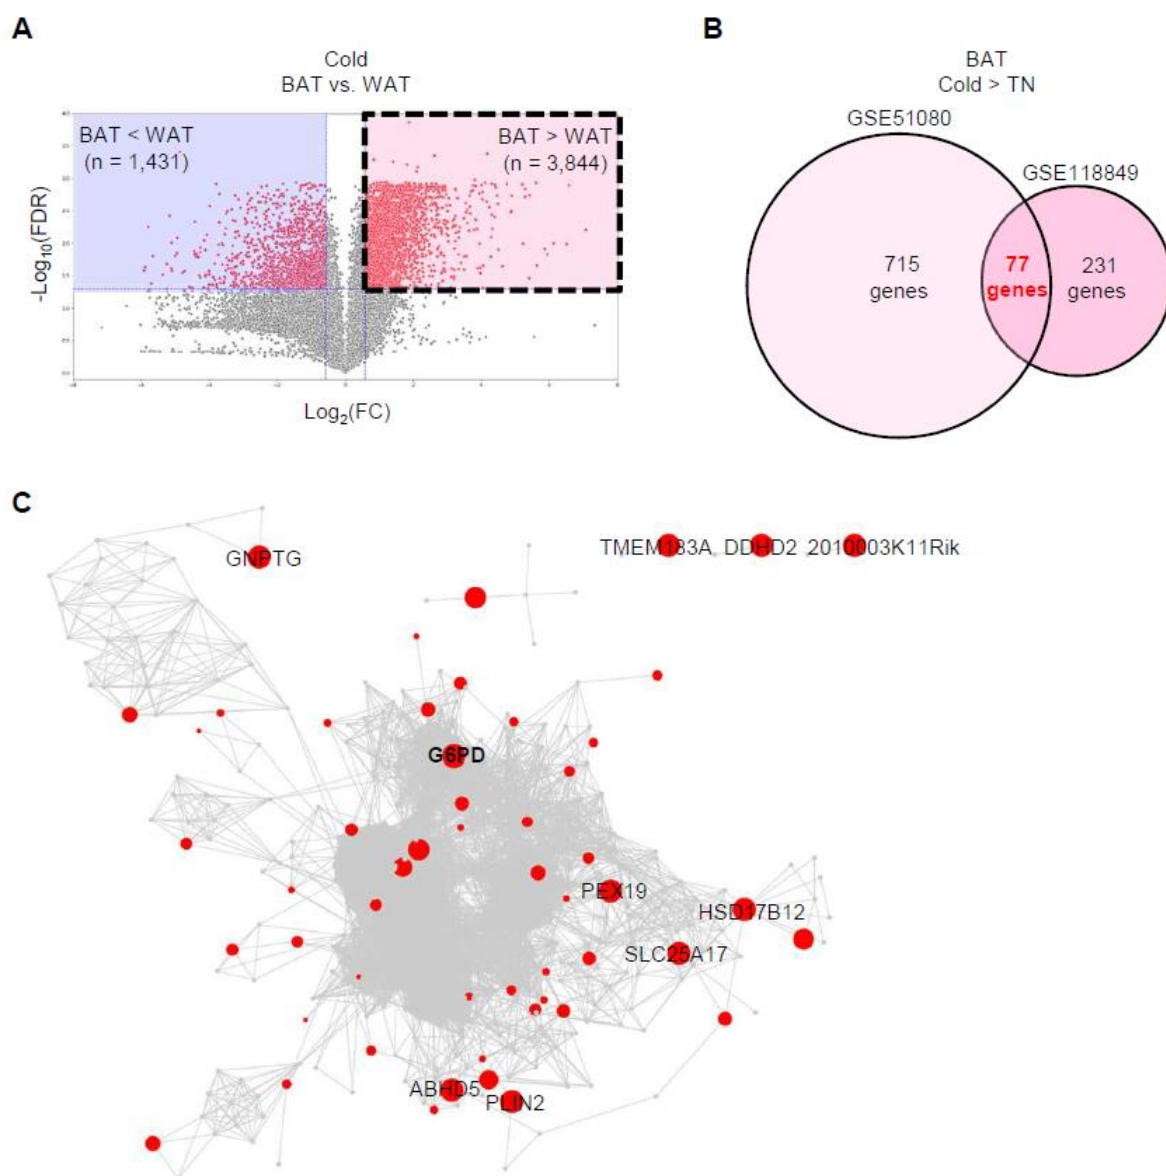

**Supplementary Figure 2. The mRNA levels of *G6pd*, inflammation- and oxidation-related genes in eWAT and BAT from obese mice.** A: The mRNA levels of *G6pd*, pro-inflammatory genes and pro-oxidative genes in eWAT and BAT from 8w HFD-fed mice compared with NCD-fed mice. B: The mRNA levels of *G6pd*, pro-inflammatory genes and pro-oxidative genes in eWAT and BAT from *db/db* mice compared to *db/+* mice. All data represent the mean  $\pm$  SEM. All qRT-PCR data were normalized to the mRNA level of *Ppia*. \* $p < 0.05$ , \*\* $p < 0.01$  vs. each control group by Student's *t*-test. The cycle threshold value for each control group is indicated.

**A (i) eWAT**

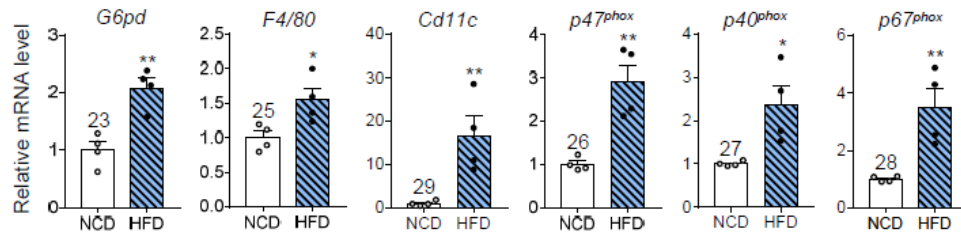

**(ii) BAT**

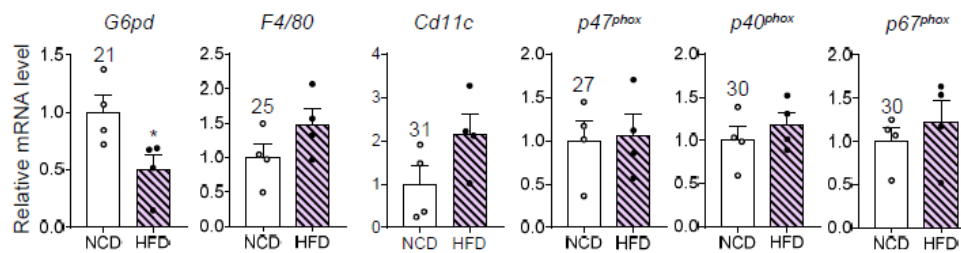

**B (i) eWAT**

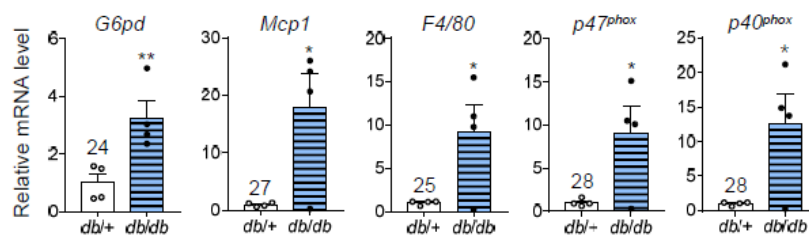

**(ii) BAT**

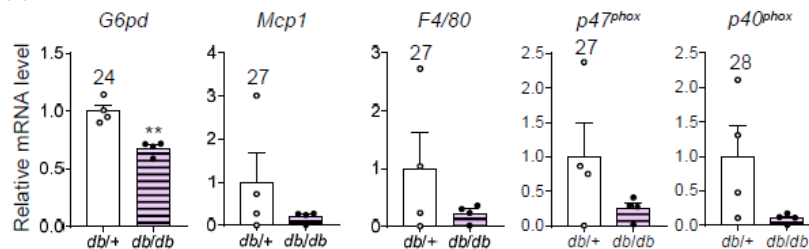

**Supplementary Figure 3. The mRNA levels of inflammatory and oxidative genes in white and brown adipocytes upon G6PD overexpression.** A and B: The mRNA levels of pro-inflammatory genes and NADPH oxidase subunits in 3T3-L1 adipocytes (A) or immortalized mouse brown adipocytes (BAC) (B) with G6PD overexpression using adenovirus. C and D: Cellular ROS level in 3T3-L1 adipocytes (C) or BAC (D) with G6PD overexpression. All data represent the mean  $\pm$  SEM. All qRT-PCR data were normalized to the mRNA level of *Ppia*. \* $p < 0.05$ , \*\* $p < 0.01$ , \*\*\* $p < 0.001$  vs. Ad-Mock group by Student's *t*-test. The cycle threshold value for each control group is indicated.

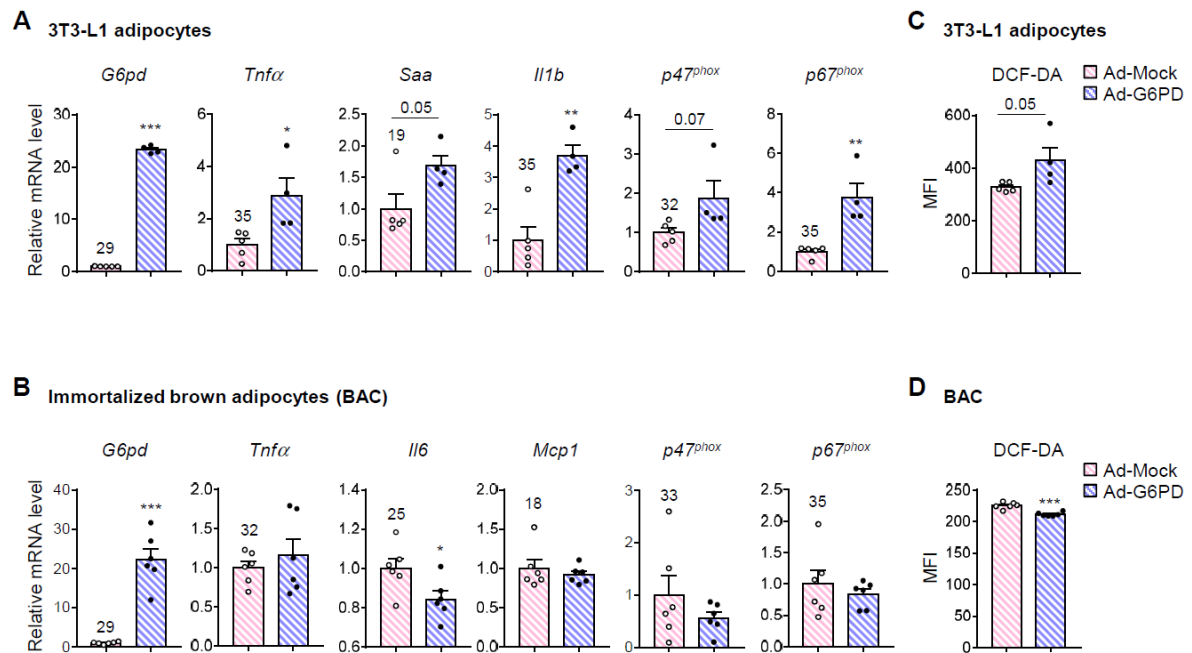

**Supplementary Figure 4. The phenotypes of WT and G6PD<sup>mut</sup> mice upon cold exposure and  $\beta$ -adrenergic stimulation.** A and B: Body weight (A) and adipose tissue weights (B) from WT and G6PD<sup>mut</sup> mice exposed to RT or 6 h cold condition. C: Serum lipid profile of WT and G6PD<sup>mut</sup> mice upon 6 h cold exposure. \*\* $p < 0.01$ , \*\*\* $p < 0.001$  vs. WT, RT group by two-way ANOVA followed by Tukey's post-hoc test. D: The mRNA levels of thermogenic marker genes in iWAT of WT and G6PD<sup>mut</sup> mice during 6 h cold exposure. qRT-PCR data were normalized to the mRNA level of *36b4*. \*\*\* $p < 0.001$  vs. WT, RT group. E–G: Respiratory exchange ratio (RER) (E), physical activity (F), and food intake (G) of WT and G6PD<sup>mut</sup> mice before and after CL (1 mg/kg body weight) injection were determined. \* $p < 0.05$ , \*\*\* $p < 0.001$  vs. WT, PBS group. All data represent the mean  $\pm$  SEM. The cycle threshold value for each control group is indicated. n.s., not significant.

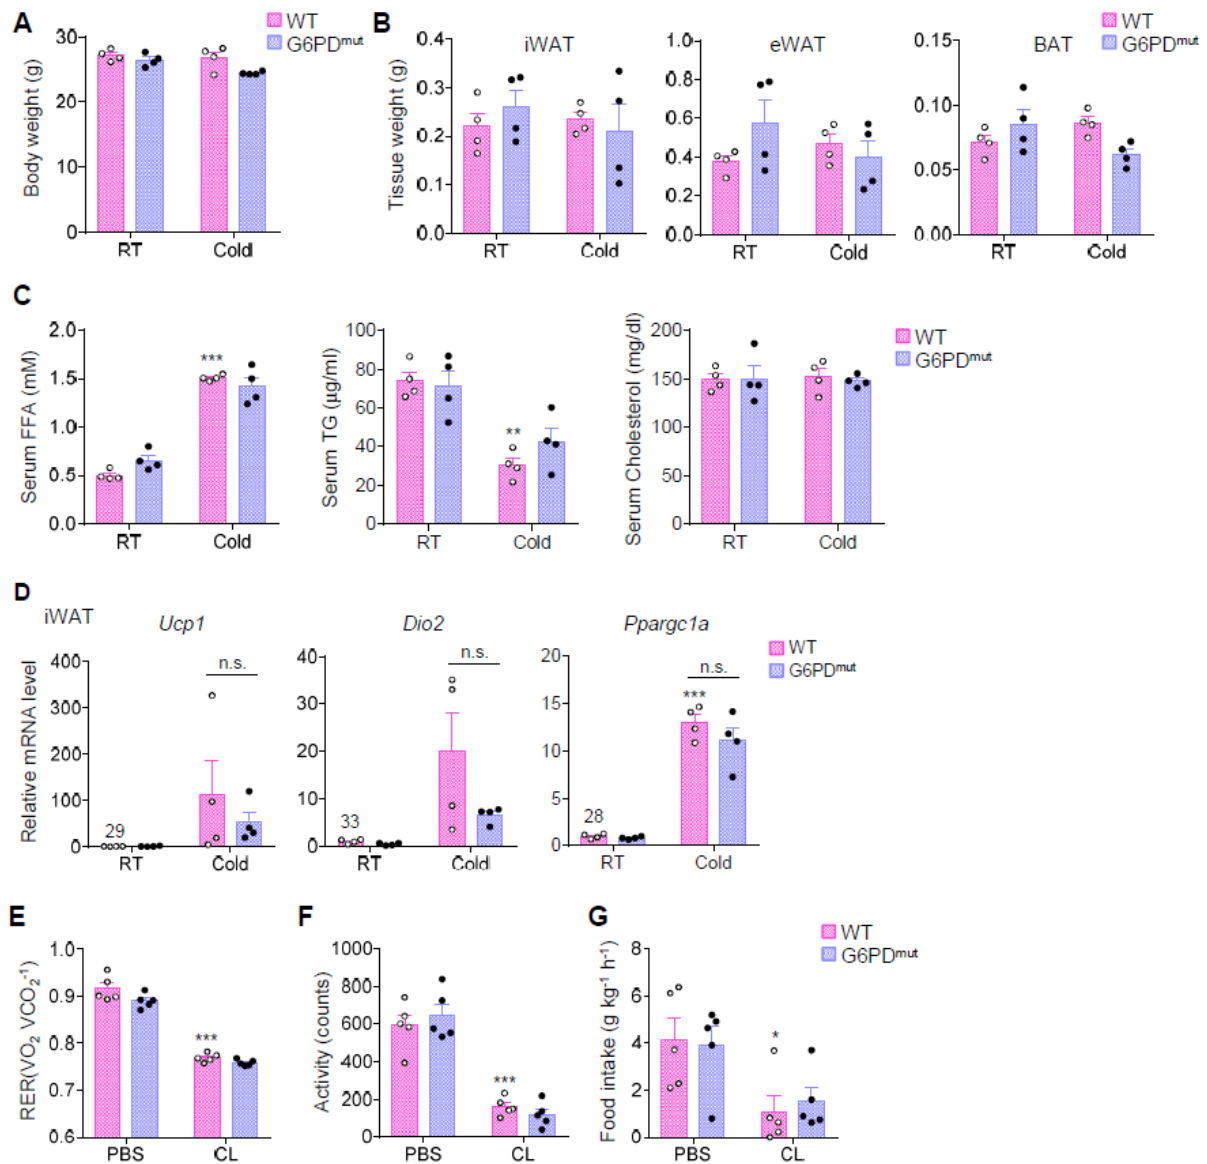

**Supplementary Figure 5. The phenotypes of BAT-specific G6PD-suppressed mice after cold exposure.** A: Tissue distribution of *G6pd* mRNA expression in BAT-specific siRNA-treated WT mice exposed to 6 h cold condition. B: Adipocyte morphology of BAT as assessed by H&E staining. Scale bars, 200  $\mu$ m. qRT-PCR data were normalized to the mRNA level of *36b4*. \* $p < 0.05$  vs. siNC group by Student's *t*-test. All data represent the mean  $\pm$  SEM. The cycle threshold value for each control group is indicated.

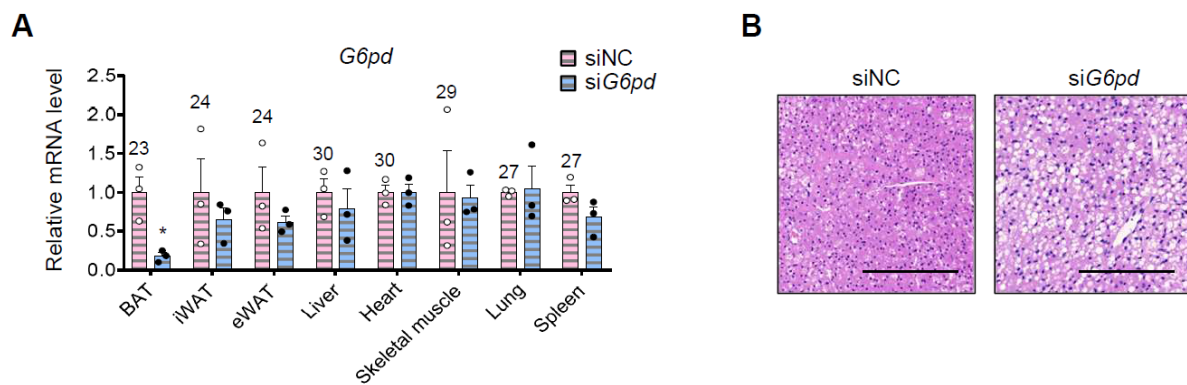

**Supplementary Figure 6. In brown adipocytes, thermogenic gene expression and mitochondrial oxygen consumption rates upon G6PD suppression.** A: Differentiated BAC was pretreated with G6PD inhibitor, 100  $\mu$ M 6-AN for 2 h. Relative mRNA levels of thermogenic genes in BAC without or with 1  $\mu$ M ISO treatment for 3 h as measured by qRT-PCR. \*\*\* $P$  < 0.001 vs. DMSO, CTL group; ## $P$  < 0.01, ### $P$  < 0.001 vs. DMSO, ISO group by two-way ANOVA followed by Tukey's post-hoc test. B and C: Thermogenic gene expressions (B) and UCP1 protein levels (C) in brown adipocytes transfected with siNC or siG6pd. \*\*\* $p$  < 0.001 vs. siNC, CTL group; ## $p$  < 0.01, ### $p$  < 0.001 vs. siNC, ISO group by two-way ANOVA followed by Tukey's post-hoc test. qRT-PCR data were normalized to the mRNA level of *Ppia*. The cycle threshold value for each control group is indicated. D and E: Mitochondrial DNA (mtDNA) contents (mtDNA/nuclear DNA ratio) upon ISO treatment (D) and OCRs in the absence of ISO (E) in brown adipocytes upon G6PD inhibition. All data represent the mean  $\pm$  SEM.

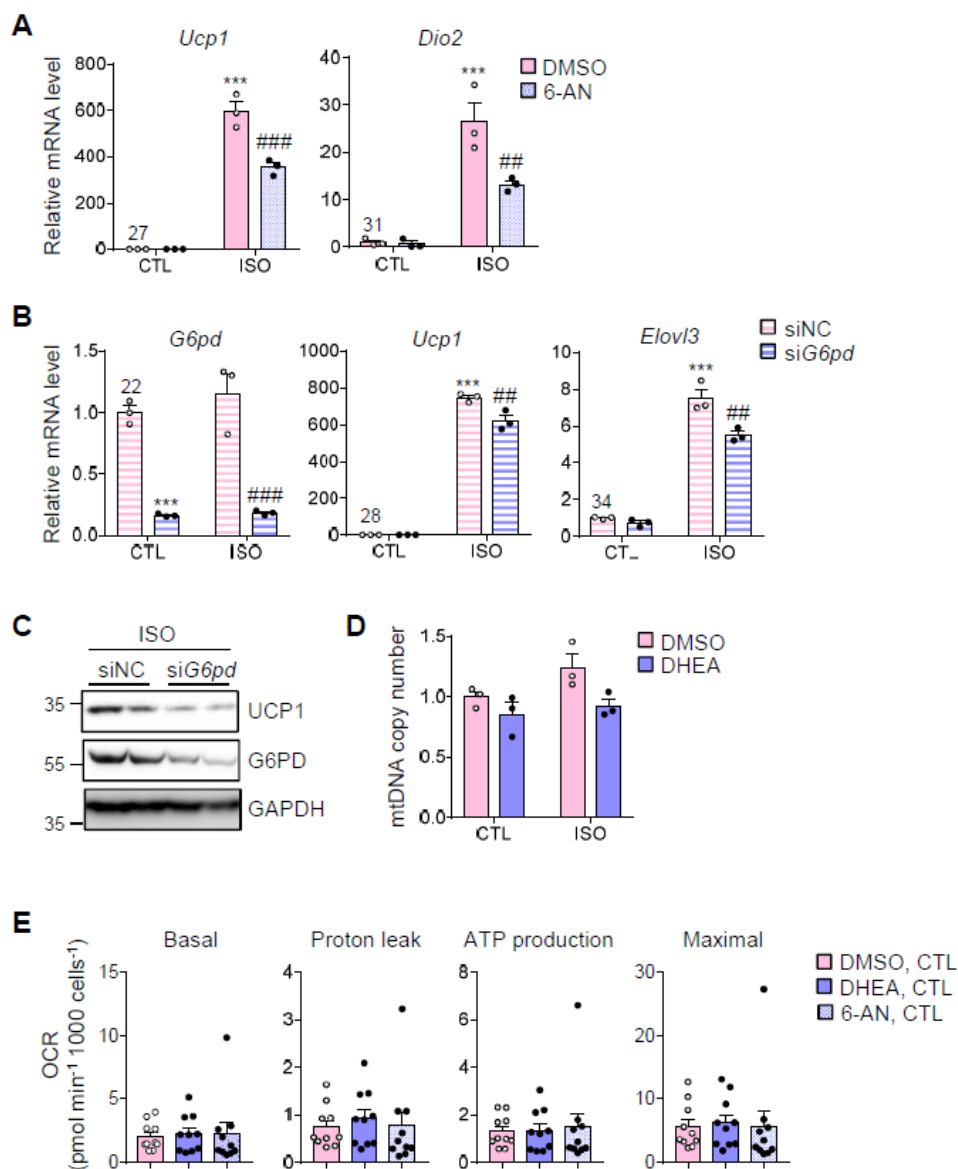

**Supplementary Figure 7. In SVC-derived brown adipocytes, expression levels of adipogenic and thermogenic genes upon G6PD deficiency.** A–C: Adipogenic gene expression levels (A), adipocyte morphology ( $\times 200$  magnification) (B), and mRNA levels of thermogenic genes (C) in BSAD. \*\*\* $p < 0.001$  vs. WT, CTL group; ## $p < 0.01$  vs. WT, ISO group by two-way ANOVA followed by Tukey's post-hoc test. qRT-PCR data were normalized to the mRNA level of *Ppia*. The cycle threshold value for each control group is indicated. All data represent the mean  $\pm$  SEM.

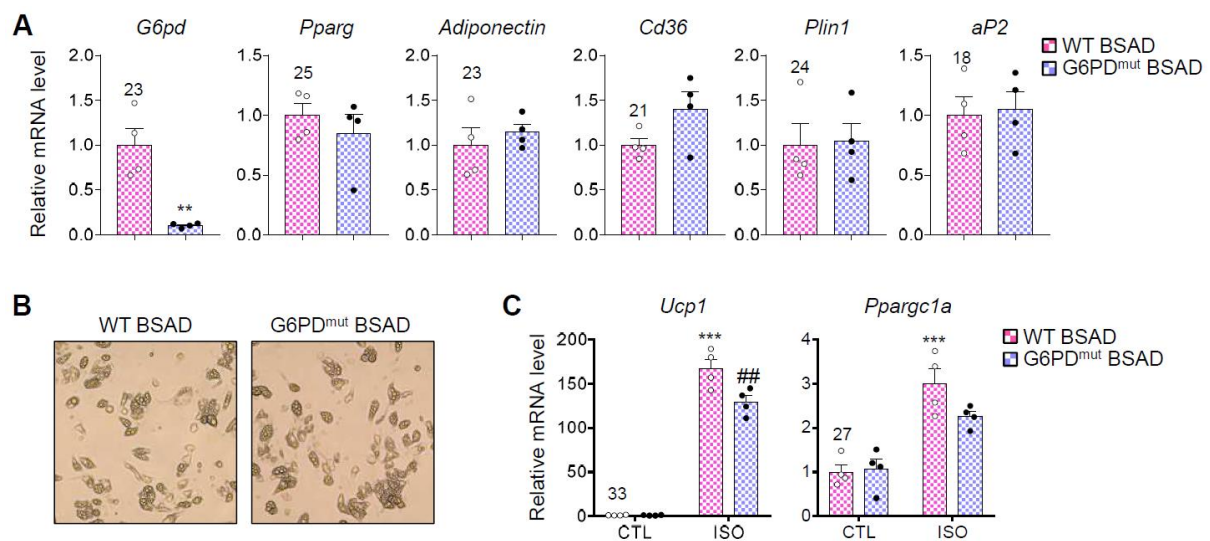



**Supplementary Figure 8. Cellular ROS level in eWAT from G6PD<sup>mut</sup> mice.** Cellular ROS level in eWAT from WT and G6PD<sup>mut</sup> mice upon cold exposure as measured DCF-DA staining. Scale bars, 75  $\mu$ m.

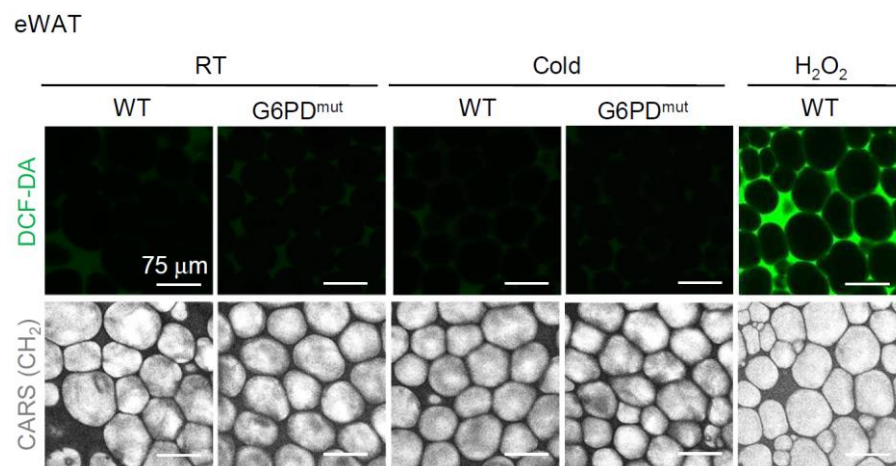

**Supplementary Figure 9. The effects of mitochondrial ROS scavenger on G6PD-deficient brown adipocytes.** A and B: The levels of mitochondrial superoxide (A) and thermogenic gene expression (B) in G6PD-inhibited brown adipocytes upon 100 nM MitoQ treatment in the presence of ISO. BAC were pretreated with 100  $\mu$ M DHEA and 100 nM MitoQ for 2 h, followed by 1  $\mu$ M ISO treatment for 3 h. \* $p$  < 0.05, \*\* $p$  < 0.01, \*\*\* $p$  < 0.001 vs. DMSO, ISO, EtOH group; ## $p$  < 0.01 vs. DHEA, ISO, EtOH group by two-way ANOVA followed by Tukey's post-hoc test. C: Rectal temperature of WT and G6PD<sup>mut</sup> mice upon MitoQ injection (5 mg/kg body weight) followed by cold exposure. MitoQ was i.p. injected into WT or G6PD<sup>mut</sup> mice. After 10 min, mice were exposed to cold condition for 4 h. \* $p$  < 0.05, \*\* $p$  < 0.01 vs. WT, EtOH group; ### $p$  < 0.001 vs. G6PD<sup>mut</sup>, EtOH group; \$\$ $p$  < 0.01 vs. WT, MitoQ group by RM-ANOVA followed by Tukey's post-hoc test. D and E: The levels of mitochondrial ROS (D) and thermogenic gene expressions (E) in BAT of G6PD<sup>mut</sup> mice upon MitoQ injection. Scale bars, 25  $\mu$ m. \*\* $p$  < 0.01, \*\*\* $p$  < 0.001 vs. WT, cold, EtOH group by two-way ANOVA followed by Tukey's post-hoc test. All data represent the mean  $\pm$  SEM. qRT-PCR data were normalized to the mRNA level of *Ppia*. The cycle threshold value for each control group is indicated.

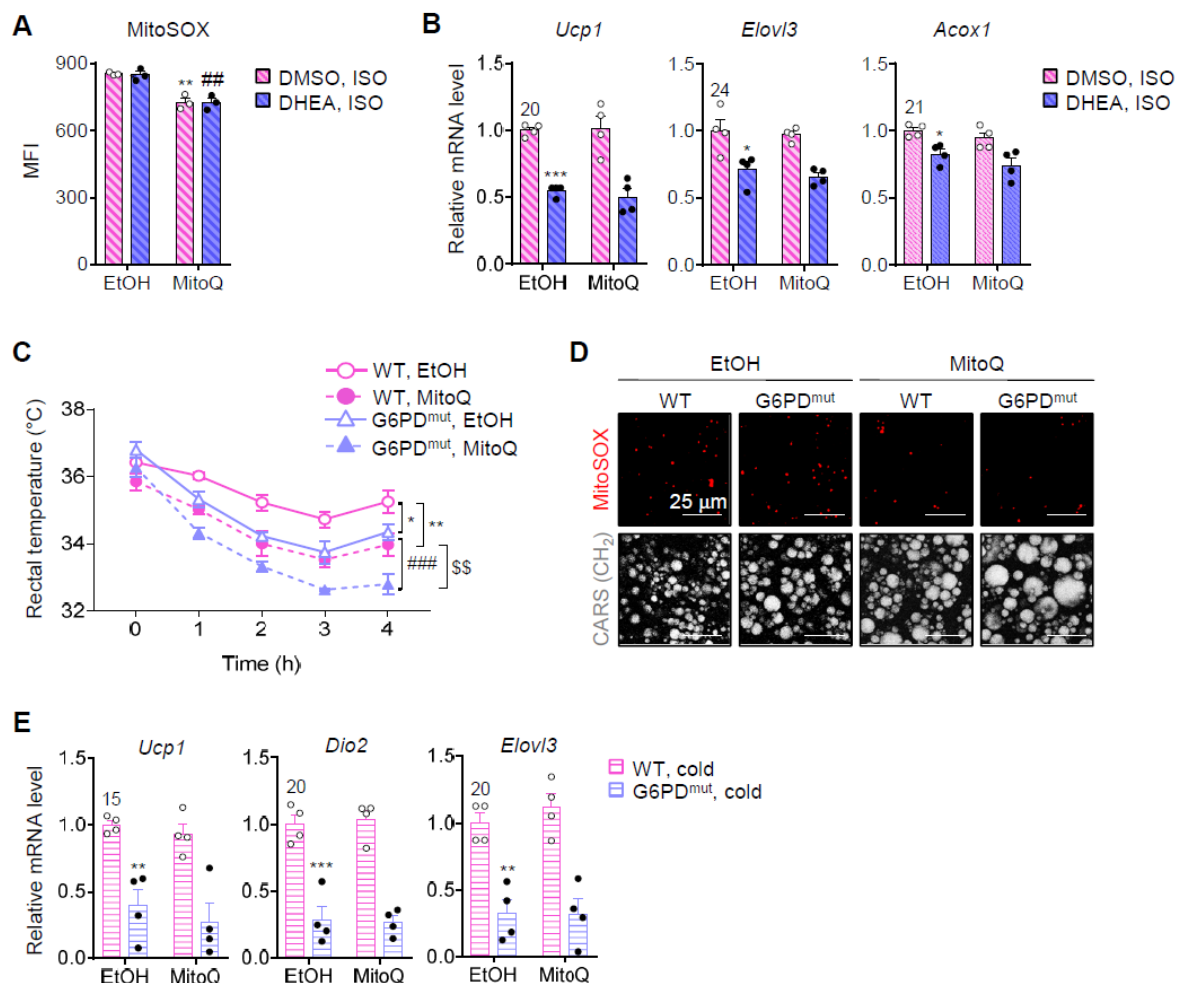

**Supplementary Figure 10. ROS-induced ERK activation in brown adipocytes upon G6PD defect.**

A: MAPK activation in BAT from WT and G6PD<sup>mut</sup> mice after 4 h CL (1 mg/kg body weight) injection. B and C: The level of ERK phosphorylation in DHEA-treated brown adipocytes (B) or BAT of G6PD<sup>mut</sup> mice (C) upon PD treatment.

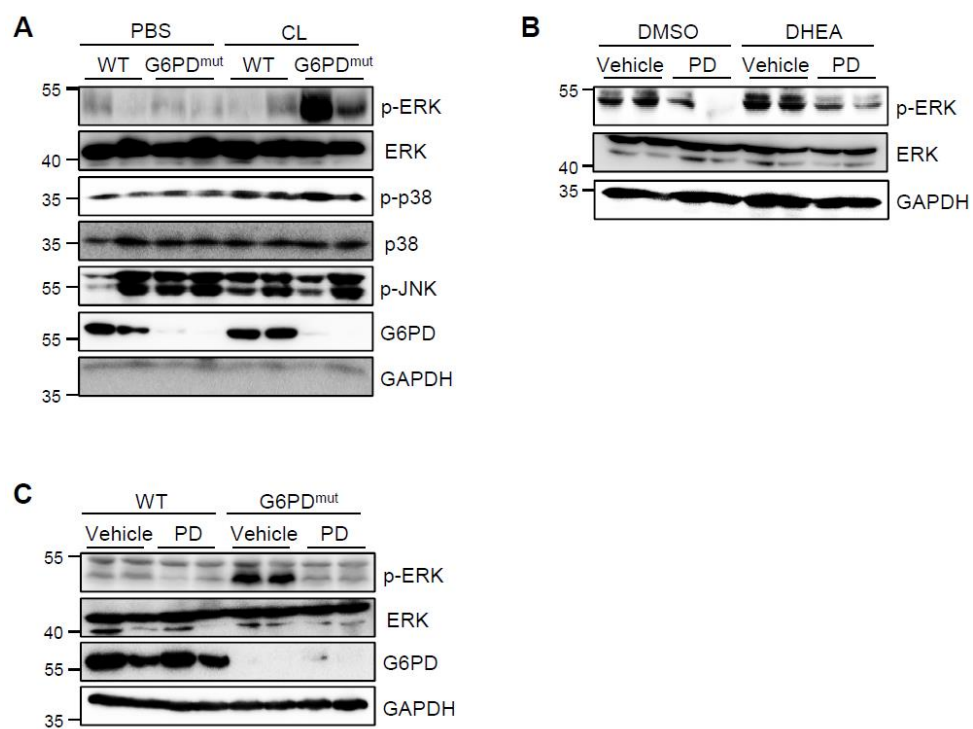

**Supplementary Figure 11. Cellular ROS and mitochondrial ROS level upon  $\beta$ -adrenergic stimulation.** Cellular ROS and mitochondrial superoxide level in BAC upon CL (2.5  $\mu$ M) and ISO (5  $\mu$ M) treatment as measured DCF-DA and mitoSOX staining. All data represent the mean  $\pm$  SEM. \*\* $p < 0.01$ , \*\*\* $p < 0.001$  vs. 0 h group; # $p < 0.05$ , ## $p < 0.01$  vs. each stimuli, 10 min group by one-way ANOVA followed by Tukey's post-hoc test. n.s., not significant; AA, antimycin A.

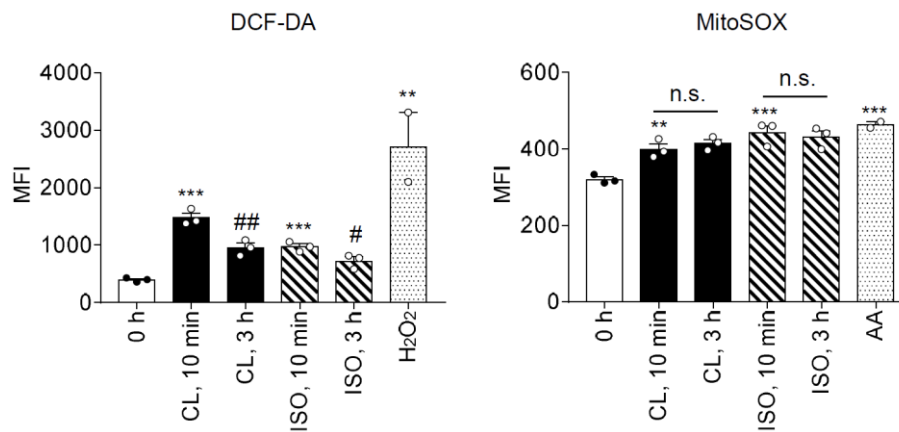

**Supplementary Figure 12. Proposed model.** In G6PD-deficient brown adipocytes, cytosolic ROS accumulation provokes ERK activation under cold or  $\beta$ -adrenergic stimulation, contributing to impairment of thermogenic program.

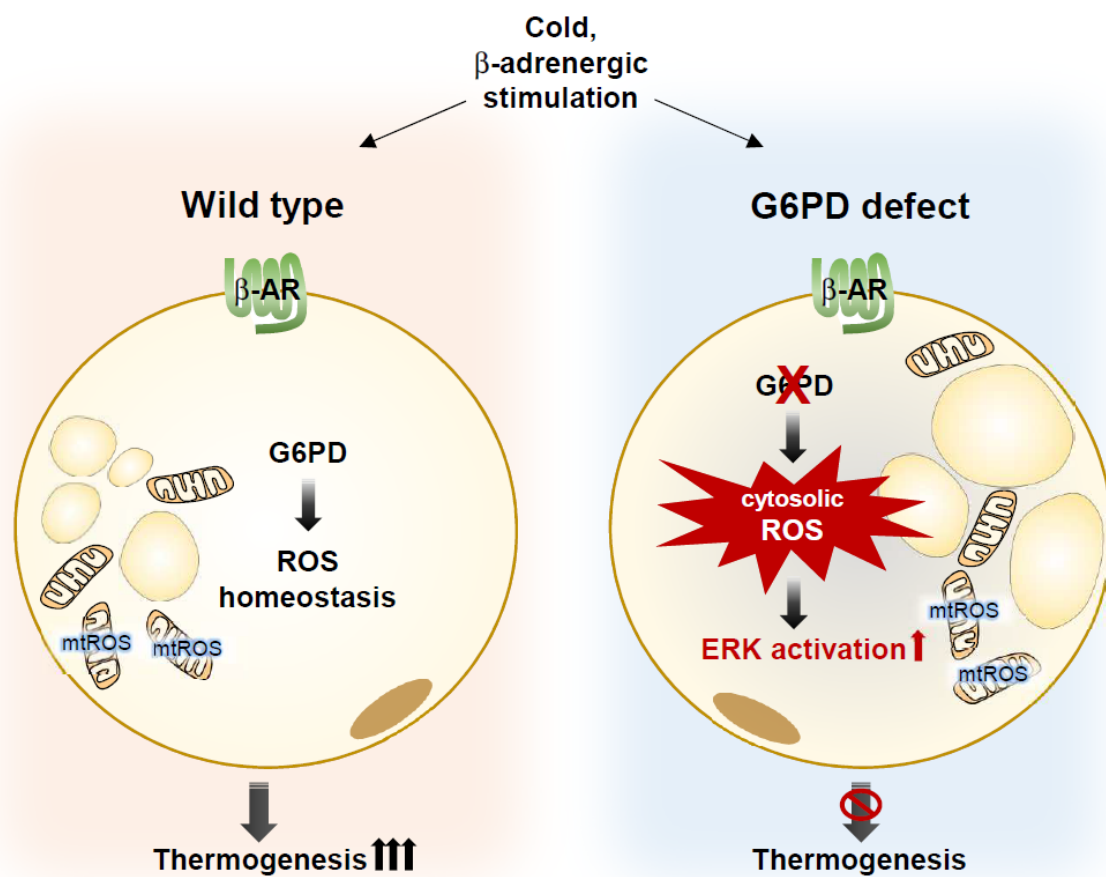

**Supplementary Table 1. Oligo sequences for siRNA**

| Gene             | Forward               | Reverse               |
|------------------|-----------------------|-----------------------|
| mouse G6pdx      | GUCAACCUCAUCCCACCUA   | UAGGUGGGAUGAGGUUGAC   |
| Negative control | AAACAAGCCCAUUCGCGGAUU | AAUCCGCGAAUGGGCUUGUUU |

**Supplementary Table 2. Primers used for qRT-PCR and mtDNA/genomic DNA ratio**

| Gene           | Forward                   | Reverse                   |
|----------------|---------------------------|---------------------------|
| mouse G6pdx    | GATCTGTGAACGTGTTTGGC      | TGTGTGTATCAGCTTGGTGG      |
| mouse Ucp1     | CTTTGCCTCACTCAGGATTGG     | ACTGCCACACCTCCAGTCATT     |
| mouse Dio2     | CAGTGTGGTGCACGTCTCCAATC   | TGAACCAAAGTTGACCACCAG     |
| mouse Ppargc1a | CCCTGCCATTGTTAAGACC       | TGCTGCTGTTCTGTTTTTC       |
| mouse Elvol3   | ATGCAACCCTATGACTTCGAG     | ACGATGAGCAACAGATAGACG     |
| mouse Cidea    | GCCGTGTTAAGGAATCTGCTG     | TGCTCTTCTGTATCGCCCAGT     |
| mouse Acox1    | CAGGAAGAGCAAGGAAGTGG      | CCTTTCTGGCTGATCCCATA      |
| mouse Ppia     | CAGACGCCACTGTGCTTTT       | TGTCTTTGGAACCTTGTCTGCAA   |
| mouse Mcp1     | AGGTCCCTGTCATGCTTCTG      | TCTGGACCCATTCTTCTTG       |
| mouse Tnfa     | CGGAGTCCGGGCAGGT          | GCTGGGTAGAGAATGGATGAACA   |
| mouse Il-6     | AGTTGCCTTCTTGGGACTGA      | TCCACGATTTCCAGAGAAC       |
| mouse F4/80    | GCTGCACCTCTGTGCCTTT       | CAGGTATGCCATGATGCTTG      |
| mouse Cd11c    | GAGGATTTCAGCATCCCAGA      | CACCTGCTCCTGACACTCAA      |
| mouse p47phox  | GATGTTCCCCATTGAGGCCG      | GTTTCAGGTCATCAGGCCGC      |
| mouse p67phox  | CTGGCTGAGGCCATCAGACT      | AGGCCACTGCAGAGTGCTTG      |
| mouse p40phox  | GCCGCTATCGCCAGTTCTAC      | GCAGGCTCAGGAGGTTCTTC      |
| mouse Il-1b    | TGCAGAGTTCCCCAACTGGTACATC | GTGCTGCCTAATGTCCCCTTGAATC |
| mouse Saa      | AGCGATGCCAGAGAGGCTGT      | ACCCAGTAGTTGCTCCTCTT      |
| mouse 36b4     | GCTCCAAGCAGATGCAGCA       | CCGGATGTGAGGCAGCAG        |
| mouse Srebp1c  | GGAGCCATGGATTGCACATT      | CAGGAAGGCTTCCAGAGAGG      |
| mouse Scd1     | CCGGAGACCCCTTAGATCGA      | TAGCCTGTAAAGATTTCTGCAAACC |
| mouse Fasn     | GCCTACACCCAGAGCTACCG      | GCCATGGTACTTGGCCTTG       |
| mouse 16s rRNA | ACATCCCAATGGTGTAGAAG      | AAGTTGAGAGCGCTTATTTG      |
| mouse 18s rRNA | CGCGGTTCTATTTTGTGGT       | AGTCGGCATCGTTTATGGTC      |

**Supplementary Table 3. NP score and degree centrality transition of candidate genes in BAT upon cold exposure**

| Gene          | GSE118849_FC | NP_score | FC rank | NP_score rank | Degree of centrality in template network | Degree of centrality in sub network |
|---------------|--------------|----------|---------|---------------|------------------------------------------|-------------------------------------|
| Ddhd2         | 4.049205     | 0.526316 | 31      | 1             | 7.32E-05                                 | 0.001459854                         |
| 2010003K11Rik | 3.822729     | 0.526316 | 34      | 1             | 7.32E-05                                 | 0.001459854                         |
| Tmem183a      | 1.535635     | 0.526316 | 61      | 1             | 7.32E-05                                 | 0.001459854                         |
| Hsd17b12      | 3.891745     | 0.344511 | 33      | 4             | 0.001538                                 | 0.026277372                         |
| Gnptg         | 1.840352     | 0.22231  | 56      | 5             | 0.000146                                 | 0.002919708                         |
| Abhd5         | 3.0354       | 0.166214 | 41      | 6             | 0.000366                                 | 0.00729927                          |
| Pex19         | 2.261019     | 0.163793 | 47      | 7             | 0.001392                                 | 0.020437956                         |
| Slc25a17      | 4.627142     | 0.155804 | 23      | 8             | 0.000293                                 | 0.005839416                         |
| Plin2         | 4.42553      | 0.153653 | 26      | 9             | 0.00022                                  | 0.004379562                         |
| G6pdx         | 3.155075     | 0.142841 | 38      | 10            | 0.003076                                 | 0.056934307                         |
| Lrrc8d        | 5.56786      | 0.138544 | 20      | 11            | 0.000146                                 | 0.002919708                         |
| Acly          | 6.72252      | 0.138348 | 14      | 12            | 0.010986                                 | 0.2                                 |
| Hacd2         | 7.445061     | 0.137755 | 11      | 13            | 0.000146                                 | 0.002919708                         |
| Mgl1          | 4.064763     | 0.13335  | 30      | 14            | 0.002563                                 | 0.011678832                         |
| Orm1          | 2.035206     | 0.133329 | 51      | 15            | 0.018163                                 | 0.21459854                          |
| Pigq          | 6.477094     | 0.125311 | 17      | 16            | 0.001025                                 | 0.018978102                         |
| Letm1         | 6.57685      | 0.124852 | 16      | 17            | 0.00022                                  | 0.004379562                         |
| Acox2         | 5.316918     | 0.124229 | 21      | 18            | 0.004907                                 | 0.083211679                         |
| Rbks          | 1.997121     | 0.122756 | 52      | 19            | 0.000879                                 | 0.017518248                         |
| Pfkfb         | 6.587111     | 0.12185  | 15      | 20            | 0.002344                                 | 0.039416058                         |
| Elovl3        | 140.7226     | 0.121775 | 1       | 21            | 0.00022                                  | 0.004379562                         |
| Retsat        | 4.18173      | 0.120872 | 29      | 22            | 0.001538                                 | 0.010218978                         |
| Gpd1          | 7.664313     | 0.120544 | 8       | 23            | 0.001099                                 | 0.017518248                         |
| Dhcr24        | 8.24017      | 0.12006  | 7       | 24            | 0.001465                                 | 0.020437956                         |
| Pgd           | 7.139776     | 0.119699 | 12      | 25            | 0.000732                                 | 0.013138686                         |
| Dpp7          | 3.097665     | 0.118501 | 39      | 26            | 0.007983                                 | 0.15620438                          |
| Sgcb          | 2.238766     | 0.11738  | 49      | 27            | 0.000732                                 | 0.01459854                          |
| Peli2         | 2.389573     | 0.117316 | 44      | 28            | 0.000293                                 | 0.005839416                         |
| Sgpl1         | 1.955796     | 0.117061 | 53      | 29            | 0.000659                                 | 0.010218978                         |
| Hebp2         | 3.075985     | 0.117015 | 40      | 30            | 0.007837                                 | 0.15620438                          |
| Pcca          | 3.462851     | 0.116398 | 36      | 31            | 0.002197                                 | 0.035036496                         |
| Adcy10        | 18.30422     | 0.116365 | 4       | 32            | 0.000806                                 | 0.002919708                         |
| Acot12        | 20.84364     | 0.113765 | 2       | 33            | 0.001392                                 | 0.023357664                         |
| Idh3a         | 2.493076     | 0.113755 | 43      | 34            | 0.00227                                  | 0.027737226                         |
| Cnm2          | 7.498979     | 0.113279 | 10      | 35            | 7.32E-05                                 | 0.001459854                         |
| Abhd6         | 1.701766     | 0.112499 | 59      | 36            | 0.002051                                 | 0.004379562                         |
| Mtor          | 5.976586     | 0.112363 | 19      | 37            | 0.007031                                 | 0.018978102                         |
| Ube2f         | 2.08759      | 0.112119 | 50      | 38            | 0.021386                                 | 0.037956204                         |
| Ncan          | 7.569822     | 0.111649 | 9       | 39            | 0.000146                                 | 0.002919708                         |
| Nudt1         | 2.259429     | 0.111391 | 48      | 40            | 7.32E-05                                 | 0.001459854                         |
| Fah           | 6.776479     | 0.111244 | 13      | 41            | 0.000806                                 | 0.010218978                         |
| Pafah2        | 4.235276     | 0.10917  | 28      | 42            | 0.000659                                 | 0.011678832                         |
| Mlec          | 2.34439      | 0.108272 | 45      | 43            | 0.00769                                  | 0.058394161                         |
| Uck2          | 3.642462     | 0.10811  | 35      | 44            | 0.001172                                 | 0.010218978                         |
| Pak1ip1       | 1.715852     | 0.107599 | 58      | 45            | 0.006006                                 | 0.002919708                         |
| Vps53         | 1.658851     | 0.107417 | 60      | 46            | 0.00293                                  | 0.023357664                         |
| Fbxl2         | 4.459444     | 0.107308 | 25      | 47            | 0.001099                                 | 0.016058394                         |
| Socs5         | 1.908951     | 0.107084 | 54      | 48            | 0.012011                                 | 0.026277372                         |
| Cux1          | 6.110062     | 0.106928 | 18      | 49            | 0.001904                                 | 0.017518248                         |
| Atp6v0a2      | 3.448155     | 0.106855 | 37      | 50            | 0.002344                                 | 0.011678832                         |
| Rbsn          | 1.718759     | 0.105609 | 57      | 51            | 0.001025                                 | 0.004379562                         |
| St3gal5       | 9.688721     | 0.105403 | 6       | 52            | 0.000513                                 | 0.010218978                         |
| Pdcd6ip       | 1.854537     | 0.105106 | 55      | 53            | 0.000513                                 | 0.008759124                         |
| Rnf185        | 2.279728     | 0.105016 | 46      | 54            | 0.000146                                 | 0.002919708                         |
| Egln1         | 4.805963     | 0.104589 | 22      | 55            | 0.00498                                  | 0.018978102                         |
| Ptk2b         | 4.340295     | 0.104247 | 27      | 56            | 0.003003                                 | 0.008759124                         |
| Acot11        | 14.08509     | 0.103368 | 5       | 57            | 7.32E-05                                 | 0.001459854                         |
| Grk3          | 2.649235     | 0.103307 | 42      | 58            | 0.000732                                 | 0.010218978                         |
| Sor11         | 20.06046     | 0.102353 | 3       | 59            | 0.000439                                 | 0.008759124                         |
| Vwa8          | 4.498722     | 0.101    | 24      | 60            | 0.000146                                 | 0.002919708                         |
| Tbc1d20       | 4.038552     | 0.100476 | 32      | 61            | 0.000146                                 | 0.002919708                         |

\* Among candidate genes, 16 genes did not exceed the threshold (800 combined scores).

**Supplementary Video 1.** Body temperature of WT and G6PD<sup>mut</sup> mice after cold exposure. Thermal infrared imaging of live mice after 4 h cold exposure, related to Fig. 3B.

**Supplementary Video 2.** Body temperature of mice with BAT-specific G6PD downregulation. BAT from WT were injected with siNC or si*G6pd* (20 µg/mouse), followed by cold exposure. After 4 h, body temperature of live mice were analyzed by thermal infrared camera, related to Fig. 3J.

**Supplementary Video 3.** Body temperature of WT and G6PD<sup>mut</sup> mice injected with PBS or NAC. WT and G6PD<sup>mut</sup> mice were i.p. injected with PBS or NAC (100 mg/kg body weight), followed by CL (0.5 mg/kg body weight) administration. After 20 min, surface body temperatures of live mice were analyzed by thermal infrared camera, related to Fig. 6H.

**Supplementary Video 4.** Body temperature of WT and G6PD<sup>mut</sup> mice injected with vehicle or PD. WT and G6PD<sup>mut</sup> mice were i.p. injected with vehicle or PD (10 mg/kg body weight), followed by cold exposure. After 4 h, body temperature of live mice were analyzed by thermal infrared camera, related to Fig. 7D.
